# Supplementary material for: Surprising features of nuclear receptor interaction networks revealed by live-cell single-molecule imaging
Source: eLife journal article supplement (doi:10.7554/elife.92979), 2023-11-17
Supplement: fig1-data4 [file elife-92979-fig1-data4-v1.pdf]

Left is multi-channel blot image of the same gel on the right blotted with the same antibody.

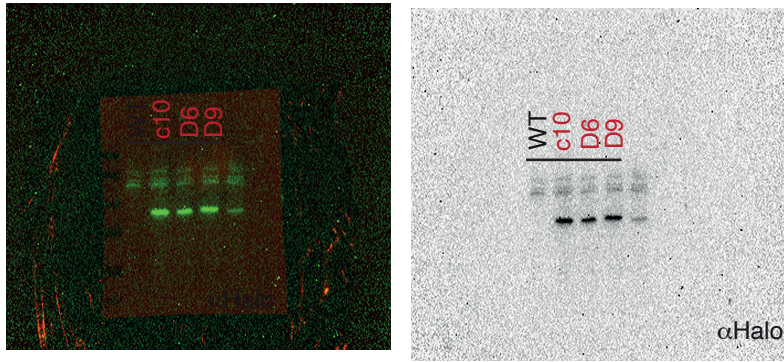

Original uncropped image for anti-Halo blotted signal for RXR $\alpha$  endo clones.

Left is multi-channel blot image of the same gel on the right blotted with the same antibody.

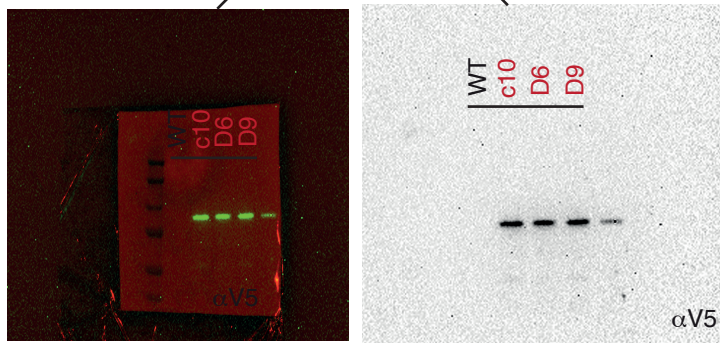

Original uncropped image for anti-V5 blotted signal for RXR $\alpha$  endo clones.

Left is multi-channel blot image of the same gel on the right blotted with anti-Centrin-2 loading control antibody.

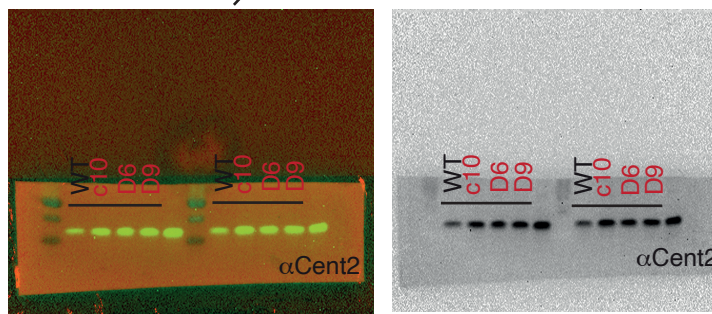

Original uncropped image for anti-Cent2 blotted signal for the single membrane that was cut to blot for anti-Halo and anti-V5 antibodies.
