# Supplementary material for: Surprising features of nuclear receptor interaction networks revealed by live-cell single-molecule imaging
Source: eLife journal article supplement (doi:10.7554/elife.92979), 2023-11-17
Supplement: fig1-figsupp1-data1 [file elife-92979-fig1-figsupp1-data1-v1.zip]

Left is multi-channel blot image of the same gel on the right blotted with the same antibody. Only the right side of the gel is relevant here.

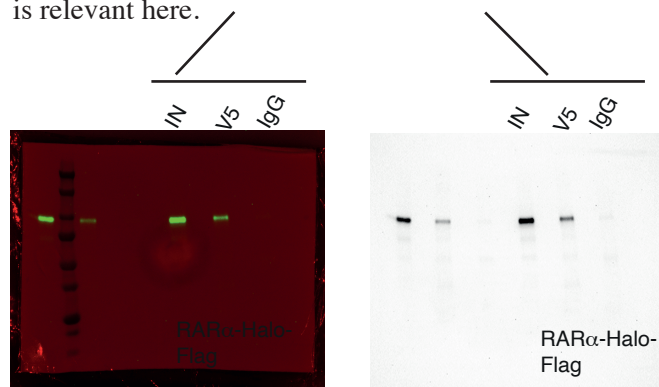

Original uncropped image for Rar $\alpha$ -Halo-Flag coIP gel blotted with anti-Flag.

Left is multi-channel blot image of the same gel on the right blotted with the same antibody. Only the right side of the gel is relevant here.

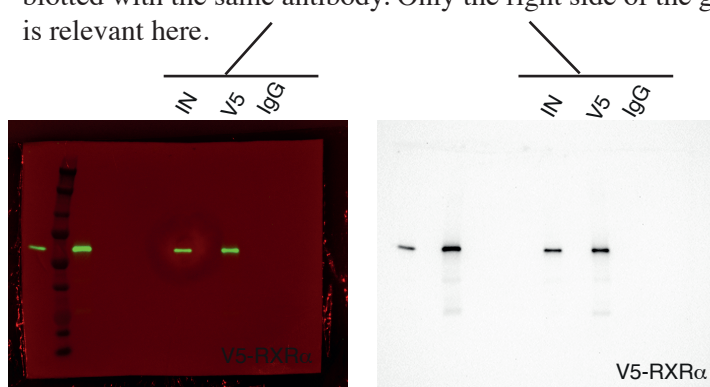

Original uncropped image for V5-RXR $\alpha$  IP gel blotted with anti-V5.

Left is multi-channel blot image of the same gel on the right blotted with the same antibody. Only the left side of the gel is relevant here.

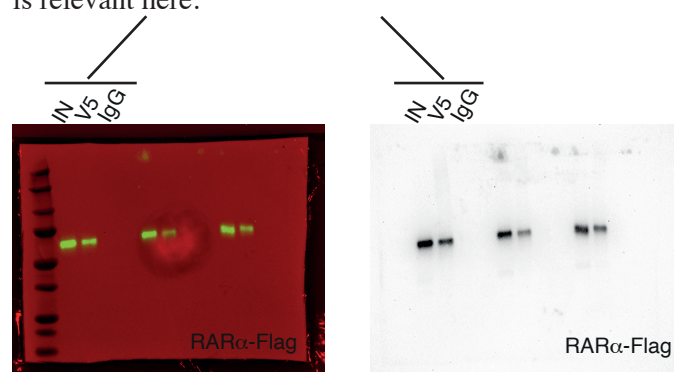

Original uncropped image for Rar $\alpha$ -Flag coIP gel blotted with anti-Flag.

Left is multi-channel blot image of the same gel on the right blotted with the same antibody. Only the left side of the gel is relevant here.

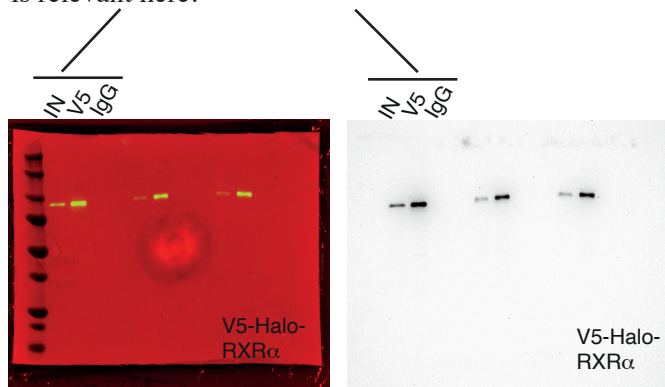

Original uncropped image for V5-Halo-RXR $\alpha$  IP gel blotted with anti-V5.
