# Supplementary material for: Surprising features of nuclear receptor interaction networks revealed by live-cell single-molecule imaging
Source: eLife journal article supplement (doi:10.7554/elife.92979), 2023-11-17

Uncropped fluorescent gels in Figure 2-Figure Supplement 2C, shown in the same order.

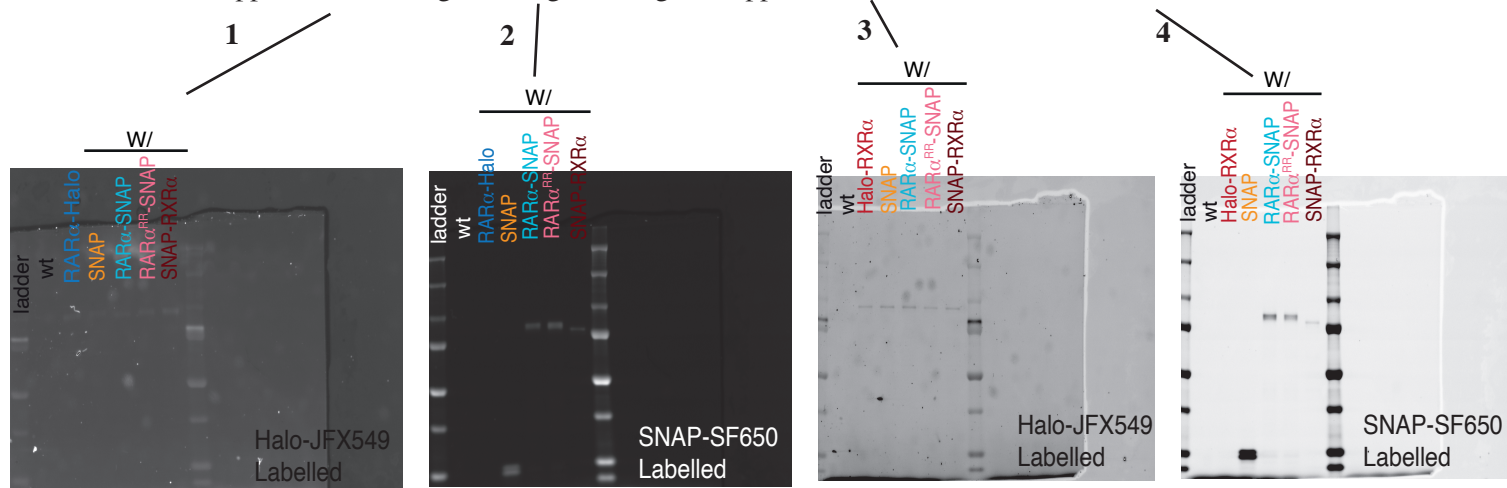

Supplement: fig2-figsupp2-data3 [file elife-92979-fig2-figsupp2-data3-v1.pdf]
