# Supplementary material for: Surprising features of nuclear receptor interaction networks revealed by live-cell single-molecule imaging
Source: eLife journal article supplement (doi:10.7554/elife.92979), 2023-11-17
Supplement: fig2-figsupp2-data5 [file elife-92979-fig2-figsupp2-data5-v1.pdf]

Left is multi-channel blot image of the same gel on the right blotted with the same antibody.

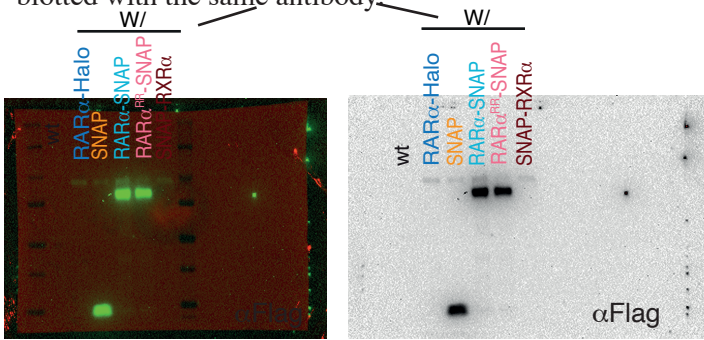

Original uncropped image for anti-Flag blotted signal for SNAP labelled transcripts in presence of RAR $\alpha$ -Halo.

Left is multi-channel blot image of the same gel on the right blotted with the same antibody.

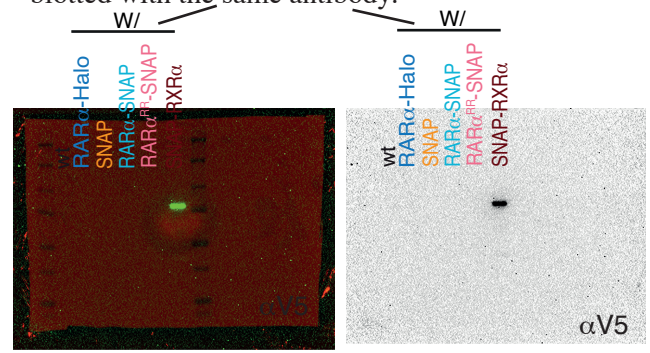

Original uncropped image for anti-V5 blotted signal for SNAP labelled transcripts in presence of RAR $\alpha$ -Halo.

Left is multi-channel blot image of the same gel on the right blotted with the same antibody.

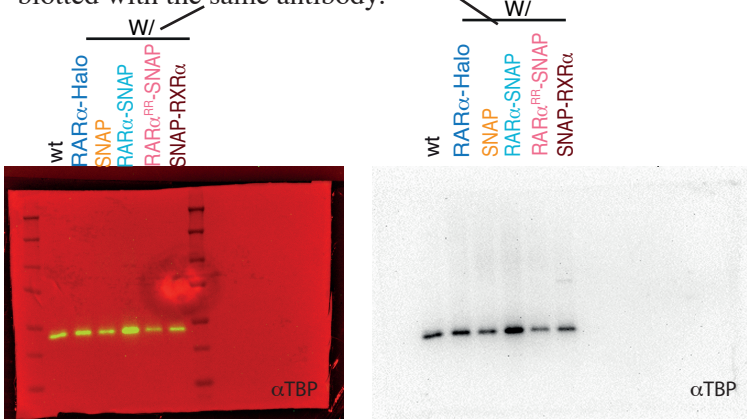

Original uncropped image for anti-TBP blotted signal for SNAP labelled transcripts in presence of RAR $\alpha$ -Halo.
